# Supplementary material for: High expression of STAT3 within the tumour‐associated stroma predicts poor outcome in breast cancer patients
Source: PubMed Central journal article supplement (PMC10315752; doi:10.1002/cam4.6014), 2023-05-18

# Supplementary Figure 1

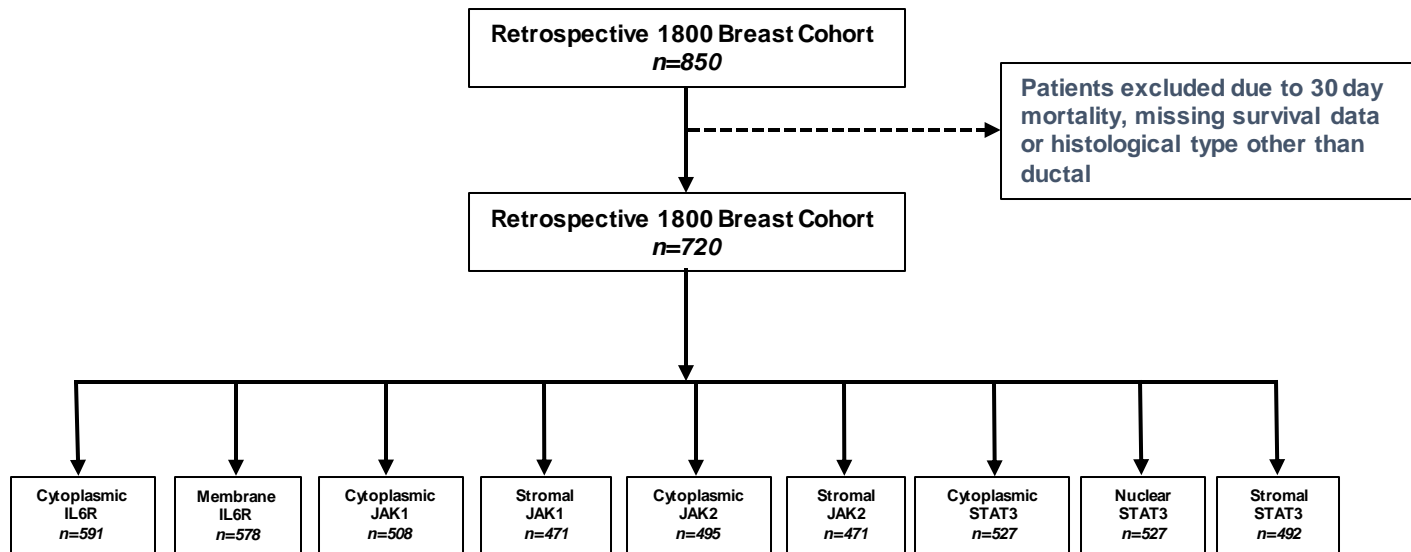

Supplement: CAM4-12-13225-s004.pdf [file CAM4-12-13225-s004.pdf]
